# Supplementary material for: Structural, Evolutionary, and Functional Analysis of the Class III Peroxidase Gene Family in Chinese Pear (Pyrus bretschneideri)
Source: Front Plant Sci. 2016 Dec 9;7:1874. doi: 10.3389/fpls.2016.01874 (PMC5145892; doi:10.3389/fpls.2016.01874)
Supplement: Table S6 — The ESTs of putative PbPRX genes. [file Table6.XLS]

## Sheet: Sheet1
The ESTs of putative PbPRX genes.
Gene name	EST hit	E value	Number of ESTs in pear ESTdb	Identities (%)
PbPRX1	Not available	Not available	Not available	Not available
PbPRX2	C1060604 86.0	1e-22	1	96
PbPRX3	scaffold17926 25.2	2e-27	1	100
PbPRX4	scaffold27774 16.6	2e-27	1	100
PbPRX5	Not available	Not available	Not available	Not available
PbPRX6	Not available	Not available	Not available	Not available
PbPRX7	C862204 9.0	2e-27	1	100
PbPRX8	C936553 49.0	2e-27	1	100
PbPRX9	Not available	Not available	Not available	Not available
PbPRX10	Not available	Not available	Not available	Not available
PbPRX11	Not available	Not available	Not available	Not available
PbPRX12	Not available	Not available	Not available	Not available
PbPRX13	Not available	Not available	Not available	Not available
PbPRX14	Not available	Not available	Not available	Not available
PbPRX15	Not available	Not available	Not available	Not available
PbPRX16	Not available	Not available	Not available	Not available
PbPRX17	Not available	Not available	Not available	Not available
PbPRX18	Not available	Not available	Not available	Not available
PbPRX19	C1069634 9.0	2e-27	1	100
PbPRX20	C816203 2.0	3e-14	44	100
PbPRX21	Not available	Not available	Not available	Not available
PbPRX22	scaffold27147 14.5	2e-27	1	100
PbPRX23	Not available	Not available	Not available	Not available
PbPRX24	Not available	Not available	Not available	Not available
PbPRX25	scaffold10396 25.1	1e-10	1	95
PbPRX26	scaffold25052 25.2	5e-13	1	95
PbPRX27	Not available	Not available	Not available	Not available
PbPRX28	Not available	Not available	Not available	Not available
PbPRX29	Not available	Not available	Not available	Not available
PbPRX30	Not available	Not available	Not available	Not available
PbPRX31	Not available	Not available	Not available	Not available
PbPRX32	scaffold12028 18.7	2e-27	1	100
PbPRX33	Not available	Not available	Not available	Not available
PbPRX34	C832542 17.0	1e-25	1	100
PbPRX35	scaffold22961 12.1	8e-18	1	96
PbPRX36	scaffold21629 4.4	2e-27	1	100
PbPRX37	Not available	Not available	Not available	Not available
PbPRX38	C1061116 17.0	2e-27	1	100
PbPRX39	C991022 27.0	2e-27	3	100
PbPRX40	Not available	Not available	Not available	Not available
PbPRX41	C735837 39.0	8e-21	1	96
PbPRX42	C953745 27.0	1e-13	1	95
PbPRX43	Not available	Not available	Not available	Not available
PbPRX44	Not available	Not available	Not available	Not available
PbPRX45	Not available	Not available	Not available	Not available
PbPRX46	Not available	Not available	Not available	Not available
PbPRX47	Not available	Not available	Not available	Not available
PbPRX48	C866210 54.0	2e-27	1	100
PbPRX49	C987474 23.0	2e-27	2	100
PbPRX50	Not available	Not available	Not available	Not available
PbPRX51	Not available	Not available	Not available	Not available
PbPRX52	Not available	Not available	Not available	Not available
PbPRX53	C985434 10.0	5e-22	2	96
PbPRX54	Not available	Not available	Not available	Not available
PbPRX55	Not available	Not available	Not available	Not available
PbPRX56	C1011472 12.0	8e-18	1	100
PbPRX57	Not available	Not available	Not available	Not available
PbPRX58	C1003470 48.0	8e-15	1	94
PbPRX59	C921573 51.0	2e-21	4	98
PbPRX60	Not available	Not available	Not available	Not available
PbPRX61	C990940 23.0	2e-27	2	100
PbPRX62	Not available	Not available	Not available	Not available
PbPRX63	scaffold772 19.3	2e-15	1	97
PbPRX64	C1066086 47.0	2e-27	2	100
PbPRX65	Not available	Not available	Not available	Not available
PbPRX66	Not available	Not available	Not available	Not available
PbPRX67	Not available	Not available	Not available	Not available
PbPRX68	C1070134 50.0	8e-18	1	93
PbPRX69	C848122 46.0	2e-27	1	100
PbPRX70	Not available	Not available	Not available	Not available
PbPRX71	C1069938 46.0	1e-22	1	96
PbPRX72	Not available	Not available	Not available	Not available
PbPRX73	C832542 17.0	3e-14	1	92
PbPRX74	C949097 7.0	2e-27	1	100
PbPRX75	C832994 5.0	2e-27	2	100
PbPRX76	Not available	Not available	Not available	Not available
PbPRX77	C1070226 28.0	2e-27	1	100
PbPRX78	scaffold8526 38.4	2e-27	1	100
PbPRX79	Not available	Not available	Not available	Not available
PbPRX80	Not available	Not available	Not available	Not available
PbPRX81	C735837 39.0	2e-27	1	100
PbPRX82	Not available	Not available	Not available	Not available
PbPRX83	scaffold12754 8.2	1e-19	1	95
PbPRX84	C892764 4.0	5e-10	1	96
PbPRX85	Not available	Not available	Not available	Not available
PbPRX86	Not available	Not available	Not available	Not available
PbPRX87	Not available	Not available	Not available	Not available
PbPRX88	C1069296 11.0	5e-10	1	100
PbPRX89	Not available	Not available	Not available	Not available
PbPRX90	Not available	Not available	Not available	Not available
PbPRX91	Not available	Not available	Not available	Not available
PbPRX92	C875564 59.0	2e-27	2	100
PbPRX93	Not available	Not available	Not available	Not available
PbPRX94	C1070134 50.0	2e-12	1	97
